1 Reconciling the potentially irreconcilable? Genotypic and phenotypic amoxicillin-clavulanate  
2 resistance in *Escherichia coli*

3

4 **Authors:** Timothy J. Davies<sup>a,b</sup>(#), Nicole Stoesser<sup>a,b,c</sup>, Anna E Sheppard<sup>a,b</sup>, Manal Abuoun<sup>d</sup>,  
5 Philip Fowler<sup>a</sup>, Jeremy Swann<sup>a,b</sup>, T. Phuong Quan<sup>a,b,e</sup>, David Griffiths<sup>a,e</sup>, Alison Vaughan<sup>a,e</sup>,  
6 Marcus Morgan<sup>c</sup>, Hang TT Phan<sup>a\*</sup>, Katie J Jeffery<sup>c</sup>, Monique Andersson<sup>c</sup>, Matt J Ellington<sup>f</sup>,  
7 Oskar Ekelund<sup>g</sup>, Neil Woodford<sup>b,f</sup>, Amy J. Mathers<sup>h</sup>, Robert A. Bonomo<sup>i</sup>, Derrick W. Crook<sup>a,b,c,e</sup>,  
8 Tim E.A. Peto<sup>a,b,c,e</sup>, Muna F Anjum<sup>d</sup>, A. Sarah Walker<sup>a,b,e</sup>

9

10 **Affiliations:**

11 a) Nuffield Department of Medicine, Oxford University, Oxford, United Kingdom

12 b) National Institute for Health Research (NIHR) Health Protection Research Unit on  
13 Healthcare Associated Infections and Antimicrobial Resistance at University of Oxford, UK

14 c) Oxford University Hospitals NHS Foundation Trust, Oxford, UK

15 d) Bacteriology, Animal and Plant Health Agency, Surrey UK

16 e) NIHR Biomedical Research Centre, Oxford, UK

17 f) Antimicrobial Resistance and Healthcare Associated Infections (AMRHAI) Reference Unit,  
18 National Infection Service, Public Health England, London UK

19 g) Department of Clinical Microbiology and the EUCAST Development Laboratory, Kronoberg  
20 Region, Central Hospital, Växjö, Sweden

- 21 h) Division of Infectious Diseases and International Health, Department of Medicine,  
22 University of Virginia Health System, Charlottesville, Virginia, USA  
23 Clinical Microbiology, Department of Pathology, University of Virginia Health System,  
24 Charlottesville, Virginia, USA
- 25 i) Louis Stokes Cleveland Veterans Affairs Medical Centre, Research Service, Cleveland, OH;  
26 Case Western Reserve University, Departments of Medicine, Biochemistry, Molecular  
27 Biology and Microbiology, Pharmacology, and Proteomics and Bioinformatics; CWRU-  
28 Cleveland VAMC Centre for Antimicrobial Resistance and Epidemiology (Case VA  
29 CARES); and Geriatric Research Education and Clinical Centers (GRECC), Louis Stokes  
30 Cleveland Department of Veterans Affairs, Cleveland, OH

31

32 Running Title: Amoxicillin-clavulanate Resistance Genetics in *E. coli*

33 #Address correspondence to Timothy J Davies, [timothy.davies@ndm.ox.ac.uk](mailto:timothy.davies@ndm.ox.ac.uk)

34

35

36 **Abstract:**

37 Resistance to amoxicillin-clavulanate, a widely used beta-lactam/beta-lactamase inhibitor  
38 combination antibiotic, is rising globally, yet susceptibility testing remains challenging. To test  
39 whether whole-genome sequencing (WGS) could provide a more reliable assessment of  
40 susceptibility than traditional methods, we predicted resistance from WGS for 976 *E. coli*  
41 bloodstream infection isolates from Oxfordshire, UK, comparing against phenotypes from the  
42 BD Phoenix (calibrated against EUCAST guidelines). 339/976 (35%) isolates were amoxicillin-  
43 clavulanate resistant. Predictions based solely on beta-lactamase presence/absence performed  
44 poorly (sensitivity 23% (78/339)) but improved when genetic features associated with  
45 penicillinase hyper-production (e.g. promoter mutations, copy number estimates) were  
46 considered (sensitivity 82% (277/339);  $p < 0.0001$ ). Most discrepancies occurred in isolates with  
47 peri-breakpoint MICs. We investigated two potential causes; the phenotypic reference and the  
48 binary resistant/susceptible classification. We performed reference standard, replicated  
49 phenotyping in a random stratified subsample of 261/976 (27%) isolates using agar dilution,  
50 following both EUCAST and CLSI guidelines, which use different clavulanate concentrations.  
51 As well as disagreeing with each other, neither agar dilution phenotype aligned perfectly with  
52 genetic features. A random-effects model investigating associations between genetic features and  
53 MICs showed that some genetic features had small, variable and additive effects, resulting in  
54 variable resistance classification. Using model fixed-effects to predict MICs for the non-agar  
55 dilution isolates, predicted MICs were in essential agreement ( $\pm 1$  doubling dilution) with  
56 observed (BD Phoenix) MICs for 691/715 (97%) isolates. This suggests amoxicillin-clavulanate  
57 resistance in *E. coli* is quantitative, rather than qualitative, explaining the poorly reproducible

58 binary (resistant/susceptible) phenotypes and suboptimal concordance between different  
59 phenotypic methods and with WGS-based predictions.

60

## 61 **Introduction**

62 Rising amoxicillin-clavulanate resistance in *E. coli* is a major healthcare challenge, with  
63 increasing incidence of resistant bloodstream infections (BSI)(1) threatening its utility as the  
64 most commonly used antibiotic in Europe.(2) Consequently, many hospitals are considering  
65 broadening their first-line empiric antibiotics for common infections. However, significant  
66 uncertainty is created by observed differences between the two main assays for amoxicillin-  
67 clavulanate susceptibility in the classification of clinical samples.(3) These differences are so  
68 large that increasing amoxicillin-clavulanate resistance was suggested to be primarily due to  
69 laboratories switching from US Clinical Laboratory Standards Institute (CLSI) to European  
70 Committee on Antimicrobial Susceptibility Testing (EUCAST) guidelines.(4) Recent work,(5)  
71 however, suggests that changes in laboratory protocols are unlikely to account for the majority of  
72 the increase in resistance. Only one study has investigated whether there are underlying genetic  
73 causes for the ongoing rise in amoxicillin-clavulanate resistance,(6) but found no evidence of  
74 clonal expansion of any specific amoxicillin-clavulanate-resistant strains. However, the genetic  
75 epidemiology of amoxicillin-clavulanate resistance mechanisms was not investigated.

76

77 In addition to its widespread clinical use, amoxicillin-clavulanate is a model for beta-  
78 lactam/beta-lactamase inhibitor (BL/BLI) combinations, which are the focus of renewed  
79 attention(7) due to the development of novel BL/BLIs with activity against highly drug-resistant  
80 organisms.(8) EUCAST has recently published guidelines on setting breakpoints for BL/BLIs,(9)  
81 but the inconsistencies seen in testing and clinically interpreting amoxicillin-clavulanate  
82 resistance likely extend to novel BL/BLIs.(10)

83

84 One solution is to instead identify the genetic determinants characterizing resistance (resistance  
85 genotype) using whole-genome sequencing (WGS).(11) This approach may be particularly  
86 helpful for BL/BLI, as recent studies have suggested that traditional phenotyping is less accurate  
87 in isolates producing extended spectrum beta-lactamases.(12) Rather than resistance being  
88 associated with the simple presence/absence of specific genes, previous studies have found much  
89 amoxicillin-clavulanate resistance is likely attributable to mechanisms which increase the  
90 effective concentration of beta-lactamases (e.g. additive effects of multiple beta-lactamases,(13)  
91 increasing gene expression(14) or modifying cell permeability(15)). Given the added complexity  
92 of both phenotype and genotype, studies using WGS to predict phenotypic resistance have either  
93 not included amoxicillin-clavulanate,(16, 17) compared against only one set of breakpoints,(18)  
94 or only tested small sets of pre-selected samples.(19) Similar studies investigating other  
95 BL/BLIs, such as piperacillin-tazobactam, reported poor accuracy when predicting resistance  
96 from genotype.(20)

97  
98 We therefore investigated concordance between WGS-derived genotypes and amoxicillin-  
99 clavulanate susceptibility phenotypes in a large, unselected set of Oxfordshire *E. coli* BSI  
100 isolates from 2013-2015. We assessed whether extending the usual presence/absence genetic  
101 approach to include features that might increase beta-lactamase expression (copy number,  
102 promoter type) would improve concordance, and quantified the impact of particular genetic  
103 variants and testing guidelines (EUCAST, CLSI) on minimum inhibitory concentrations (MICs).

104

## 105 **Results**

106 *Routine laboratory phenotypes and amoxicillin-clavulanate resistance genotypes*

107 Of the 1039 *E. coli* BSI occurring between January 2013-August 2015 in Oxfordshire, UK, 1000  
108 had at least one isolate stored by Oxford University Hospitals (OUH) NHS Foundation Trust  
109 microbiology laboratory. In most (992/1000 (99%)) infections, only a single *E. coli* was isolated;  
110 however, two different *E. coli* were grown from culture in 8 cases, giving a total of 1008 distinct  
111 *E. coli* isolates. Each of these isolates had linked antimicrobial susceptibility test (AST) data  
112 from the Oxford University Hospitals (OUH) NHS Foundation Trust microbiology laboratory  
113 using the BD Phoenix (Beckton, Dickinson and Company). All obtained isolates were  
114 sequenced, with 976/1008 (97%) having WGS data meeting pre-determined quality controls  
115 designed to identify mixtures and poor-quality sequences. Overall, these 976 isolates represented  
116 968/1039 [93%] *E. coli* BSI (Supplementary Figure S1). 339/976 (36%) had amoxicillin-  
117 clavulanate MIC > 8/2 mg/L by EUCAST breakpoints (Supplementary Table S1).

118  
119 The collection was highly diverse, representing 152 different sequence types (STs). The most  
120 common was ST73 (161,17%) (Supplementary Figure S2), followed by ST131 (124,13%),  
121 which had the highest percentage of phenotypically-resistant isolates (N=74,60%) and was the  
122 only ST associated with amoxicillin-clavulanate resistance (chi-squared  $p < 0.0001$  compared with  
123  $p > 0.16$  for all other STs).

124  
125 The most common beta-lactam resistance mechanisms identified (using ARIBA(21) (default  
126 parameters) and tBLASTn/BLASTn (see Methods)) were acquired beta-lactamase genes, which  
127 were identified in 515/976 (53%) isolates. Most of these (448/515 (87%)) harbored only a single

128 transmissible beta-lactamase gene. Among the 67 isolates with more than one beta-lactamase  
129 gene, the most common combination was *bla*<sub>CTX-M-15</sub> and *bla*<sub>OXA-1</sub> (N=27, Supplementary Table  
130 S2B). Overall *bla*<sub>TEM</sub> was by far the most common mechanism identified (occurring in 427/976  
131 (44%) isolates), followed by *bla*<sub>CTX-M</sub> (N=73 (7%)), *bla*<sub>OXA</sub> (N=62 (6%)) and *bla*<sub>SHV</sub> (N=23  
132 (2%)) (Supplementary Figure S2, Supplementary Table S2). For the 594 transmissible beta-  
133 lactamases identified, median DNA copy number from mapping coverage was 2.23 (IQR  
134 1.73,3.31); 227 (38%) had >2.5-fold coverage (the threshold to predict resistance derived from  
135 receiver operating characteristic (ROC) analysis of isolates with only one beta-lactamase  
136 identified, Supplementary Methods, Supplementary Figure S3). Variant *bla*<sub>TEM</sub> and *ampC*  
137 promoters considered to be associated with increased expression were identified in 49 (5%) and  
138 20 (2%) isolates respectively (Supplementary Table 3A, 3C). 31 (3%) isolates potentially had  
139 one non-functional porin, of which 22 also contained a beta-lactamase gene; however, no isolate  
140 had “functionally lost” both *ompC* and *ompF* (Supplementary Table S4).

141

#### 142 *WGS-derived resistance prediction compared with routine phenotyping*

143 We compared two genetic resistance prediction algorithms for amoxicillin and amoxicillin-  
144 clavulanate (see Methods). The first, denoted the “basic” prediction algorithm, was analogous to  
145 common WGS-based resistance methods and only predicting resistance for isolates containing  
146 inhibitor resistant beta-lactamase genes (e.g. *bla*<sub>OXA-1</sub>, *bla*<sub>TEM-30</sub>). The second denoted the  
147 “extended” prediction algorithm, additionally evaluated *bla*<sub>TEM</sub> and *ampC* promoter mutations,  
148 estimates of beta-lactamase gene DNA copy number and porin loss-of-function mutations.  
149 Including the additional features (i.e. the “extended” approach) had little impact on our ability to  
150 identify ampicillin resistance but significantly improved amoxicillin-clavulanate resistance



151 prediction (~~Table 1~~[Table 1](#), amoxicillin sensitivity 98% basic vs 96% extended; amoxicillin-  
152 clavulanate sensitivity 23% basic vs 82% extended, McNemar's  $p < 0.0001$ ). However, the  
153 increased sensitivity also came at the cost of modestly reduced specificity (Table 1). Overall  
154 categorical agreement of WGS-derived with observed phenotype increased from 712 (73%) to  
155 868 (89%) when these extended genetic features were included.

156

157 Investigating the cause of lower than optimal agreement, even using the extended algorithm,  
158 showed that most false positive predictions were made on the basis of increased beta-lactamase  
159 gene DNA copy-number (~~Error! Reference source not found.~~[Table 2](#)). Although there was a  
160 clear association between increasing copy-number and MIC ( $p < 0.0001$ ), resistance prediction  
161 based on increased DNA copy-number ( $> 2.5$ ) was less accurate than other extended algorithm  
162 components (positive predictive value (PPV) = 0.77 compared to  $> 0.97$  for all other algorithm  
163 components), with both resistant isolates with lower copy-number beta-lactamases and  
164 susceptible isolates with higher copy beta-lactamases (Figure 1).

165

166 The distribution of MICs in isolates with concordant vs discordant predictions suggested an  
167 alternative explanation (Figure 2), with the extended algorithm performing better at predicting  
168 susceptibility/resistance in non-peri-breakpoint isolates. Overall the algorithm correctly  
169 classified 463/469 (99%) isolates with MIC  $\leq 4/2$  mg/L as susceptible and 230/250 (92%)  
170 isolates with MIC  $\geq 32/2$  mg/L as resistant. Notably, of 79 discordant isolates containing only  
171 non-inhibitor-resistant beta-lactamases, 64 (81%) had peri-breakpoint (8/2-16/2mg/L) MICs.

172

173

174 Given these findings, we therefore investigated two other hypotheses that could explain the low  
175 agreement in peri-breakpoint isolates: (i) variable accuracy of the different phenotypic methods,  
176 and (ii) the binary resistant/susceptible classification being too simplistic.

177

178 *Variability in reference standard agar dilution phenotypes (EUCAST and CLSI based)*

179 291/976 (30%) isolates were selected for repeated agar dilution phenotyping using stratified  
180 random subsampling to enrich for resistant isolates both with and without beta-lactamase genes  
181 (see Methods, Supplementary Methods, Supplementary Figure S1). Of these 291 isolates, 261  
182 (90%) passed the additional quality control steps designed to remove potential undetected  
183 mixtures, and were included in the agar-dilution subsample (details in Supplementary Methods;  
184 in brief, all colonies had to be of one morphology on blood-agar purity plates and MICs for each  
185 of amoxicillin and both amoxicillin-clavulanate fixed (EUCAST)/ratio (CLSI) tests had to be in  
186 essential agreement on 2 or more repeat tests). The stratified random sampling enriching for  
187 resistant phenotypes meant that 160/261 (61%) subsample isolates were amoxicillin-clavulanate-  
188 resistant by routine AST (Supplementary Table S1). All STs with >10 isolates in the main  
189 sample were represented, with 52 (20%), 43 (16%) and 29 (11%) isolates being ST131, ST73  
190 and ST69, respectively, as were all resistance gene families in the main sample (Supplementary  
191 Figure S2).

192

193 As expected, phenotypes from different reference-standard AST methods were often discordant  
194 (Figure 3). EUCAST-based agar dilution (using the fixed 2mg/L clavulanate concentration) only

195 agreed with CLSI-based agar dilution (using the 2:1 ratio of amoxicillin:clavulanate) for 143/261  
196 (55%) isolates (27 agreed resistant, 116 agreed susceptible). For the remaining 118 isolates,  
197 EUCAST-based agar dilution results were more conservative than CLSI-based agar dilution.  
198 Major discrepancies occurred for 39 isolates, being classed resistant by EUCAST-based agar  
199 dilution and susceptible by CLSI-based agar dilution. The remaining 79 isolates were EUCAST-  
200 resistant CLSI-intermediate. Excluding isolates classified as intermediate by CLSI, categorical  
201 agreement between the two reference-standard methods was 79%. Considering CLSI-  
202 intermediate as resistant had little impact on the overall categorical agreement (85%). Each of  
203 these test methods also often classified isolates differently to the BD Phoenix (Figure 3), but, as  
204 expected, given the BD Phoenix used in the OUH routine laboratory is calibrated against  
205 EUCAST guidelines, EUCAST-based agar dilution was in agreement more often. Of note, one  
206 isolate which only contained a partial *bla*<sub>TEM</sub> gene was repeatedly resistant on both EUCAST and  
207 CLSI-based agar dilution testing but was identified susceptible by the BD Phoenix.

208  
209 MIC results from both methods were variable on retesting (as part of triplicate repeats): more so  
210 for EUCAST-based agar dilution MICs (Supplementary Figure S4), which were not constant  
211 across repeats for 158/261 (61%) isolates versus only 73 (28%) for CLSI-based agar dilution  
212 MICs. While differences across repeats were in essential agreement with one another (i.e. less  
213 than ( $\pm 1$  doubling dilution) for all but 12 isolates for EUCAST-based agar dilution and all but 1  
214 isolate for CLSI-based agar dilution, they did cause changes in resistance classification. For  
215 EUCAST-based agar dilution, 40/261 (15%) isolates were identified as both resistant and  
216 susceptible across repeats, suggesting that even within-method categorical agreement is far  
217 poorer than the standards required for regulatory approval. Likewise for CLSI-based agar

218 dilution, MIC differences across repeats resulted in variation in resistance classification for 31  
219 (12%) isolates; however because of the CLSI-intermediate category, 28/31 (90%) of these would  
220 be classed as minor discrepancies.

221

222 *WGS-derived resistance prediction compared with reference-standard agar dilution phenotypes*

223 Overall, using the extended algorithm above, WGS classified as resistant 23/27 (85%) isolates  
224 agreed resistant by EUCAST and CLSI-based tests, 107/118 (91%) indeterminate isolates (76/79  
225 EUCAST-resistant/CLSI-intermediate, 31/39 EUCAST-resistant/CLSI-susceptible) and 17/116  
226 (15%) agreed susceptible isolates (Figure 4). Again predictions based on the presence of high  
227 copy number (>2.5x) non-inhibitor beta-lactamases alone were the least congruent with the  
228 reference-standard phenotypes. Specifically, 16/62 (26%) isolates with increased copy number  
229 beta-lactamase genes were agreed susceptible (accounting for 16 of the 17 resistance predictions  
230 in agreed susceptible isolates). Further, whilst 46/62 (74%) isolates with this mechanism were  
231 resistant on EUCAST-based agar dilution, similar to the PPV with BD Phoenix on the whole  
232 dataset, for CLSI-based agar dilution only 2/62 (3%) were CLSI resistant, 24/62 (39%) were  
233 CLSI-intermediate and 36/62 (58%) were CLSI susceptible, suggesting this threshold performs  
234 more poorly for predicting CLSI-based agar dilution phenotypes. However, as when selecting the  
235 initial threshold against BD Phoenix results, there was no threshold which perfectly predicted the  
236 CLSI-based phenotype (Supplementary Figure S2B). Only 8 (30%) of the 27 agreed resistant by  
237 EUCAST and CLSI-based tests contained inhibitor-resistant beta-lactamases. Conversely, 24/79  
238 (30%) CLSI-intermediate and 10/39 (26%) CLSI-susceptible isolates contained *bla<sub>OXA-1</sub>*,  
239 showing that identification of inhibitor-resistant beta-lactamases was neither necessary nor  
240 sufficient to predict resistance for the CLSI-based tests.

241 Similarly, assessment of the individual contribution of other genetic features to the phenotype  
242 was challenging due to co-occurrence of features in the same isolate and the impact of some  
243 features on susceptibility varying both between isolates and within isolate repeats  
244 (Supplementary Figures S3, S4). For example, 4/9 isolates with *ampC* promoter mutations in the  
245 agar dilution subsample were both resistant and intermediate on repeat testing using CLSI-based  
246 agar dilution.

247

#### 248 *WGS-derived resistance prediction in peri-breakpoint and non-peri-breakpoint isolates*

249 As with routine AST, WGS predictions of reference-standard phenotypes were more accurate for  
250 non-peri-breakpoint MICs (EUCAST-based agar dilution: ( $\leq 4/2$  mg/ml,  $\geq 32/2$  mg/ml), CLSI-  
251 based agar dilution: ( $\leq 4/2$  mg/ml,  $\geq 32/16$  mg/ml)). For EUCAST-based agar dilution, WGS  
252 correctly identified resistance/susceptibility in 169/177 (95%) isolates with non-peri-breakpoint  
253 MICs, versus only 60/84 (71%) with peri-breakpoint MICs. Similarly, for CLSI-based agar  
254 dilution, excluding 79 intermediate isolates (16/8 mg/L), WGS correctly predicted 97/106 (92%)  
255 non-peri-breakpoint isolates, but predicted 43/76 (57%) isolates with MIC 8/4 mg/L as resistant.

256 Interestingly, however, there were three consistently resistant (EUCAST-based MIC  $\geq$   
257 32/2mg/L, CLSI-based MIC  $\geq 32/16$  mg/L) and three consistently susceptible (EUCAST-based  
258 MIC  $\leq 4/2$ mg/L, CLSI-based MIC  $\leq 4/2$  mg/L) discrepant. All three resistant discrepant were  
259 explained by complexities inferring phenotype from WGS. One had a novel *bla*<sub>CTX-M</sub> variant  
260 (CTX-M-15-like, Ser130Gly mutation). Previous work on mechanisms of beta-lactamase  
261 inhibition suggests mutations at Ambler position(22) 130 likely lead to inhibitor resistance(7),  
262 and a similar mutation (Ser130Thr CTX-M-190) resulted in sulbactam and tazobactam  
263 resistance.(23) The other two isolates had antibiograms consistent with *ampC* hyper-production

264 (cefoxitin resistant, ceftazidime resistant, cefepime susceptible), but we were unable to identify  
265 complete promoter sequences matching our reference (CP009072.1) in the region upstream of  
266 *ampC*. This may suggest insertion of alternative elements upstream of *ampC* could have led to  
267 both fragmented assemblies and have driven increased expression; however from WGS data  
268 alone it is difficult to distinguish if this has truly occurred or instead may be due to other  
269 undetected beta-lactamase resistance mechanisms. All three susceptible discrepant had beta-  
270 lactamases present at mildly elevated copy numbers (2.5-3.5x relative DNA coverage) leading to  
271 WGS prediction of resistance, which may be due to inherent unavoidable difficulty selecting  
272 cutoffs for predicting phenotype (Supplementary Figure S3B).

273

#### 274 *Impact of individual resistance features on a continuous measure of susceptibility*

275 Random-effects models were used to investigate the impact of test method and WGS-identified  
276 genetic elements on agar dilution  $\log_2$  MICs simultaneously, and to create a WGS-based  
277 resistance prediction for comparison with phenotype (Supplementary Methods). Elements were  
278 categorised depending on frequency (Supplementary Table S5). The most predictive aspect of  
279 each element (including presence/absence of genes and/or promoter mutations and/or gene  
280 dosage) was selected using the Akaike Information Criterion (AIC) (Supplementary Methods).  
281 Interaction terms between genetic elements (reflecting saturation effects) and with test  
282 methodology (reflecting differential impact of the same genetic mechanism depending on the  
283 amoxicillin:clavulanate ratio) were included where  $p < 0.05$ .

284

285 All beta-lactamases were associated with increased MICs in univariable models (Supplementary  
286 Table S6) and these associations generally persisted in multivariable models, although their  
287 magnitude decreased markedly (Figure 5, Supplementary Table S7). The largest effects of beta-  
288 lactamase presence/absence were for *bla*<sub>OXA-1</sub> (a class 2d beta-lactamase, denoted blaOXA:2d)  
289 and members of the ‘other’ group of beta-lactamases, comprising either inhibitor-resistant beta-  
290 lactamases (N=10), or those with unknown impact on beta-lactam susceptibility (N=4)  
291 (Supplementary Table S5). These caused two-three fold and four-fold doubling dilution increases  
292 in EUCAST-based MIC respectively. The effects of non-inhibitor resistant *bla*<sub>TEM</sub> (denoted  
293 *bla*<sub>TEM:2b</sub>) and *bla*<sub>SHV</sub> (denoted blaSHV:2b) genes were more complex. For each, presence  
294 alone in an isolate was only associated with a small, often non-significant increase in MIC by  
295 either method (*bla*<sub>TEM</sub>: impact on change in log<sub>2</sub>(MIC) CLSI-based=+0.36 [p=0.01], EUCAST-  
296 based=+0.14 [p=0.51]; *bla*<sub>SHV</sub>: change in log<sub>2</sub>(MIC) CLSI-based=+0.03 [p=0.93], EUCAST-  
297 based=-0.61 [p=0.27]). However, for both, higher copy number (i.e. gene dosage) was associated  
298 with higher MIC. These effects were small but additive (e.g. EUCAST-based MIC change in  
299 log<sub>2</sub>(MIC) per doubling of copy number *bla*<sub>TEM</sub>=+0.79 [p<0.0001], *bla*<sub>SHV</sub>=+0.71 [p=0.004],  
300 detail in Supplementary Table S7A). Like beta-lactamases, all “significant” promoter mutations  
301 were associated with increased MICs (p<0.0001). In particular, “significant” *ampC* promoter  
302 mutations were independently associated with large increases in MIC (impact on change in  
303 log<sub>2</sub>(MIC) CLSI-based=+2.60 [p<0.0001], EUCAST-based=+4.25 [p<0.0001]). Interestingly,  
304 there was no clear change in MIC independently associated with suspected porin loss in our data  
305 (p≥0.06), despite porin loss being associated with a large effect in unadjusted analysis  
306 (Supplementary Table S6, change in log<sub>2</sub>(MIC) +2.28 (CLSI) and +4.17 (EUCAST))..

307

308 Of note, when increased copy number effects were included, EUCAST-based testing  
309 methodology accentuated increases in MIC caused by genetic resistance features other than for  
310 suspected porin loss and presence of *bla*<sub>CTX-M</sub> genes (the *bla*<sub>CTX-M:2be</sub>  
311 group)( $p_{\text{heterogeneity}} \leq 0.05$ ). EUCAST-based methodology however was also associated with  
312 increased between and within sample standard deviation (Supplementary Table S7B).

313

#### 314 *Predictions of MIC in an independent validation set*

315 Final EUCAST-based agar-dilution model estimates were then used to predict MICs for the  
316 715/976 non-subsample isolates, which were then compared with BD Phoenix MICs. MIC  
317 predictions were in agreement for 557/715 (78%) isolates and in essential agreement (within  $\pm 1$   
318 doubling dilution) for 691/715 (97%). However, these 715 non-subsample isolates included  
319 11 isolates which contained resistance mechanisms not present among the agar-dilution  
320 subsample isolates from which the model was derived (e.g. different beta-lactamase variants).  
321 Excluding these, prediction performance was similar, with agreement for 554/704 (79%) isolates  
322 (Figure 6) and essential agreement for 683/704 (97%) isolates. Similarly to comparisons between  
323 the different antimicrobial susceptibility testing methods (Figure 3), agreement between  
324 predicted and observed resistant/susceptible classifications was lower (90%) despite having high  
325 essential agreement of MICs. While overall performance was good, three isolates had predicted  
326 MICs three doubling dilutions lower than observed. One had an unusual yet reproducible  
327 phenotype [ampicillin susceptible, amoxicillin-clavulanate resistant]. This rare phenotype has  
328 generally been found in non-*E. coli* Enterobacteriaceae, and is thought to be due to either  
329 mechanisms of *ampC* induction(24) or the differential activity of amoxicillin and ampicillin.(25)  
330 We were unable to identify a clear causative mechanism in this isolate; however, of note, it was



331 the only isolate to contain a -11 C>T *ampC* promoter mutation.. The other two both had  
332 observed MIC  $\geq 32/2$ mg/L but only contained a low copy number *bla*<sub>TEM-1</sub> and had predicted  
333 MIC 8/2mg/L.

334

## 335 **Discussion**

336 Decisions about broadening recommended empiric antimicrobial regimens from amoxicillin-  
337 clavulanate are currently being made based on unclear AST data which appears poorly  
338 concordant with WGS-identified determinants of beta-lactamase resistance. Here, we have  
339 demonstrated that this lack of concordance is not due to unknown genetic features or inherent  
340 phenotyping problems as previously hypothesized.(26) Instead, it appears to arise from poor  
341 interpretation of how known genetic mechanisms of resistance impact phenotype. Contrary to the  
342 often assumed paradigm that beta-lactam resistance is generally due to the presence/absence of  
343 specific beta-lactamases alone, mechanisms of resistance to amoxicillin-clavulanate seen  
344 regularly in a large unselected clinical dataset were multifactorial, resulting from combinations  
345 of multi-copy beta-lactamase genes, mutations in resistance gene-associated promoters, and  
346 inhibitor resistance mechanisms. The individual effects of some of these features on MIC were  
347 small, variable and additive, resulting in only minor shifts around clinical breakpoints. This  
348 potentially explains inconsistencies on repeated phenotyping, and may be a consequence of the  
349 genetic basis of resistance rather than an inherent test weakness. A further corollary is that  
350 discrepancies between genotypic predictions and phenotype are inevitable when using  
351 susceptible/resistant binary classifications. Finally, the phenotypic testing methodology  
352 significantly affected the magnitude of the effect of these resistance features on the MIC. These  
353 issues, when combined, resulted in inconsistent binary phenotypes despite reliable MICs, and

354 consequently led to inevitable suboptimal concordance both between different phenotypic testing  
355 methodologies and also with WGS-based susceptibility/resistance predictions An alternative  
356 approach would be to use WGS to predict MICs directly. We demonstrated this was possible by  
357 predicting the MIC to within one doubling dilution (essential agreement) of the observed MIC  
358 for 97% of isolates from a population-representative set of *E. coli* BSI.

359

360 Our study highlights the importance of isolate sampling frame, phenotyping method and  
361 breakpoint selection. A previous study of 76 *E. coli* isolated from cattle (19), which reported  
362 high sensitivity and specificity of WGS to predict amoxicillin-clavulanate resistance, contained  
363 highly-resistant isolates (30% containing *bla*<sub>CMY-2</sub>), and only attempted to predict CLSI-defined  
364 resistance (>32/16 mg/L). In contrast, in our study, similar to other population representative  
365 studies of human isolates,(6, 14) only a small proportion of amoxicillin-clavulanate resistance  
366 was due to inhibitor-resistant beta-lactamases, with most of the resistance being due to hyper-  
367 production of beta-lactamases. Further, while EUCAST argue that pharmacodynamic data  
368 support choice of breakpoint and clavulanate concentration (9, 27), there is no definitive  
369 evidence as to which method has stronger associations with either clinical outcome or genotype.  
370 We therefore assessed WGS against both commonly used methods (EUCAST, CLSI).

371

372 Compared with other studies of BL/BLIs and *E. coli* causing human infections, we found less  
373 BL/BLI resistance was accounted for by inhibitor-resistant beta-lactamases.(20) To identify  
374 resistance in our population-representative set of isolates, we found it critical to consider genetic  
375 features that alter expression of beta-lactamases. Although the individual effects of some of these  
376 features on MICs were small, they were important, because MICs for many isolates were close to

377 the breakpoint. Further, given the small size of these effects and effects of testing methodology,  
378 isolates could exhibit either susceptible or resistant phenotypes on repeat testing, supporting the  
379 concept of an “intermediate” phenotype, which is not accounted for in the EUCAST guidelines.  
380 The discrepancies between EUCAST and CLSI phenotypes we observed were similar to  
381 previous studies,(3) suggesting that phenotypic interpretation for one of our most commonly  
382 used clinical antibiotics remains open to question. The one mechanism for which we found no  
383 evidence of effect was porin loss: this may reflect difficulty detecting these effects from WGS  
384 alone or be a simple power issue given rarity of this mechanism in our population-based sample,  
385 since porin loss has been associated with raised MICs to other BL/BLI combination antibiotics in  
386 isolates containing *Klebsiella pneumoniae* carbapenemases.(28)

387  
388 The main study strengths are the large, population-representative sampling frame; detailed,  
389 replicated, reference-grade phenotyping for a substantial subset of isolates on which prediction  
390 models were developed (“training set”) and a large number of additional isolates with single  
391 phenotypes assessed by a commercial clinically accredited platform (“test set”); detailed and  
392 complete genotyping; and the statistical modelling. While model performance on other datasets  
393 with geographical differences in resistance mechanisms and prevalence is unknown, its good  
394 performance in unselected clinical isolates with resistance mechanisms commonly seen in  
395 practice (in contrast to many previous studies of WGS-based resistance prediction(29)) suggest it  
396 may be generalizable. Further, the consistency of individual findings with previous literature  
397 (including inconsistent phenotype(30), mechanisms of genetic resistance(31) and poor  
398 performance of beta-lactamase presence/absence-only prediction for BL/BLI resistance (20, 32))  
399 provide confidence that the combined results may apply across different settings. A further study

400 strength was our use of more complete representations of the mechanisms of beta-lactam  
401 resistance. Compared to other studies of WGS-based resistance prediction which have either just  
402 used presence/absence of beta-lactamases or machine learning methods directly on sequence  
403 data, our models more easily align with traditional approaches of studying antimicrobial  
404 resistance and provide interpretable estimates of the direct effects of different mechanisms. A  
405 limitation is that we could only investigate proxies for some important genetic features, e.g.  
406 increased DNA copy number leading to increased expression. WGS is unable to directly quantify  
407 these effects, which thus require additional characterization by alternative methods, leading to  
408 concern that resistance prediction from WGS alone would be highly challenging. In practice  
409 however, the good predictive performance of our model using relatively simple proxies suggests  
410 many of these features can indeed be approximated from WGS data. Modelling associations  
411 between resistance features and MIC directly allowed us to avoid inferring the phenotype from  
412 the genotype using pre-specified rules and account for the effects of multiple features existing in  
413 individual isolates. The complexity of the underlying associations we discovered highlights the  
414 challenges facing standardized methods for predicting resistance across multiple drugs and  
415 species,(33) and the need for automated approaches based on machine learning to take into  
416 account proxies for increased expression.

417  
418 The main limitations of this study relate to its size. While we determined repeat agar dilution  
419 phenotypes for a relatively large number of isolates (n=261) compared to other studies,(30) many  
420 resistance elements were still rare. This had three important consequences: some infrequent  
421 features had to be categorized together for modelling, interactions between all combinations  
422 features (e.g. combinations of beta-lactamases) could not be definitively assessed, and some

423 mechanisms present in our testing set were not present in the training set (e.g. some rare known  
424 beta-lactamase variants, many only in a single isolate, Supplementary Table S2) and so their  
425 effect could not be estimated. Model results however suggested these had limited consequences.  
426 Firstly, the features causing the greatest MIC increases were those traditionally associated with  
427 amoxicillin-clavulanate resistance,(7) their specific impact being modelled here for the first time.  
428 Secondly, only a small number of isolates had resistance mechanisms not seen in the training  
429 dataset (N=11), meaning impact on performance was minimal (essentially their effect was  
430 assumed to be 0). This issue is inevitable given the substantial diversity of *E. coli* and incomplete  
431 knowledge of resistance mechanisms, but the excellent performance in the remaining 704/715  
432 isolates suggests the vast majority of clinical isolates could be amenable to WGS-based MIC  
433 prediction, leaving a much smaller, more tractable number of isolates needing additional  
434 phenotypic investigation. Another potential limitation was the use of agar dilution as our  
435 reference-standard phenotype, a method which, while previously endorsed by EUCAST,(34) is  
436 no longer recommended, with broth microdilution now recommended instead. By contrast CLSI  
437 still considers agar dilution as equivalent to broth microdilution.(35) Reassuringly, differences  
438 we found between the BD Phoenix and agar-dilution were similar to a previous study comparing  
439 BD Phoenix with reference-standard broth microdilution,(36) suggesting this would have  
440 relatively little impact on our overall results.

441  
442 In summary, amoxicillin-clavulanate resistance in *E. coli* is quantitative, rather than qualitative;  
443 in reality, resistance is a continuum built up by many individual features inevitably resulting in  
444 poor reproducibility and suboptimal concordance with binary classifications. WGS can identify  
445 the causes of amoxicillin-clavulanate resistance in *E. coli* provided the approach is extended to

446 consider the complicated, polygenic, and expression-related nature of this resistance. This  
447 suggests a genetic approach could offer a less assay dependent way to assess amoxicillin-  
448 clavulanate resistance. With renewed interest in using BL/BLIs to treat highly drug-resistant  
449 infections, our study has implications for both clinical practice and research. Given susceptibility  
450 phenotypes are highly dependent on the phenotypic method used, they must be interpreted with  
451 caution. Genetic approaches have the potential to circumvent this issue. Importantly however,  
452 the assumption that BL/BLI resistance is binary (susceptible/resistant) may be unhelpful as the  
453 same underlying resistance feature can be associated with MICs just below or just above the  
454 breakpoint. Given the variability and complexity in both the underlying mechanisms and  
455 resulting phenotype, a more transparent approach considering background genetic features,  
456 expression levels of beta-lactamases, MIC values and clinical syndrome, is likely needed to  
457 guide management decisions.

458

## 459 **Materials and Methods**

### 460 *Study population and routine microbiological processing*

461 *E. coli* isolated from all monomicrobial or polymicrobial blood cultures at Oxford University  
462 Hospitals (OUH) NHS Foundation Trust between 01/Jan/2013-31/Aug/2015 were included,  
463 excluding repeat positive cultures within 90-days of an index positive. Automated AST was  
464 performed in the routine laboratory (BD Phoenix; Beckton, Dickinson and Company) and MICs  
465 interpreted using EUCAST breakpoints. Data were extracted from the Infectious Diseases in  
466 Oxfordshire Research Database (IORD)(37) which has Research Ethics Committee and Health  
467 Research Authority approvals (14/SC/1069, ECC5-017(A)/2009).

468

469 *DNA extraction and sequencing*

470 Isolates were re-cultured from frozen stocks stored in nutrient broth plus 10% glycerol at -80°C.  
471 DNA was extracted using the QuickGene DNA Tissue Kit S (Kurabo Industries, Japan) as per  
472 manufacturer's instructions, with an additional mechanical lysis step (FastPrep, MP Biomedicals,  
473 USA) immediately following chemical lysis. A combination of standard Illumina and in-house  
474 protocols were used to produce multiplexed paired-end libraries which were sequenced on the  
475 Illumina HiSeq 2500, generating 151bp paired-end reads. High quality sequences  
476 (Supplementary Methods) were de-novo assembled using Velvet(38) as previously  
477 described.(39) *In silico* Achtman(40) multi-locus sequence types (MLST) types were defined  
478 using ARIBA.(21)

479

480 *Evaluating the importance of genetic features that modify effective beta-lactamase concentration*

481 We identified components of two genetic resistance prediction algorithms for amoxicillin and  
482 amoxicillin-clavulanate (Table 2, Supplementary Methods) using ARIBA(21) (default  
483 parameters) and tBLASTn/BLASTn.(41) The “basic” prediction used only presence/absence of  
484 relevant genes in the Resfinder(17) database, and the “extended” prediction additionally included  
485 *bla*<sub>TEM</sub> and *ampC* promoter mutations, estimates of DNA copy number and predicted porin loss-  
486 of-function. High DNA copy number was used as an indicator of possible gene duplication or  
487 high plasmid copy number, which are both known to cause increased beta-lactam resistance.(42,  
488 43) We made no attempt to distinguish between these two causes due to the limitations of short-  
489 read sequencing data. For *bla*<sub>TEM</sub> and *ampC* promoters, sequences identified using

490 ARIBA/BLASTn were searched for variant sites and regions previously associated with  
491 significantly increased expression.(44–46) For transmissible resistance genes, we estimated  
492 DNA copy number by comparing mapping coverage with the mean coverage of MLST genes  
493 and defined a relative coverage of >2.5 as increased copy number (based on receiver-operator-  
494 curve (ROC) analysis, Supplementary Methods; Supplementary Figure S3A). Finally, sequences  
495 found by ARIBA using reference *ompC* and *ompF* sequences (RefSeq: NC\_000913.3) were  
496 inspected for features such as indels and truncations suggesting functional porin loss.

497

#### 498 *Evaluating the impact of different phenotypic methods*

499 A subset of 291 isolates were selected for replicate agar dilution phenotyping using random  
500 sampling within strata defined by phenotype-genotype combinations (see Supplementary  
501 Methods for full sub-sampling procedure, Supplementary Figure S1A,B). Replicate agar dilution  
502 phenotyping used clavulanate concentration and MIC interpretation according to both EUCAST  
503 and CLSI guidelines. The aim was to explore reasons for discordance between observed  
504 phenotype and predictions made on the basis of beta-lactamase gene presence/absence alone.  
505 The subsampling therefore aimed to enrich for several groups of isolates, including resistant (by  
506 BD Phoenix) isolates both with and without beta-lactamases identified from WGS, isolates with  
507 peri-breakpoint MICs and susceptible isolates containing beta-lactamases. For each method, sub-  
508 cultures (from frozen stocks) were tested in triplicate using ISO-Sensitest agar plates containing  
509 amoxicillin and clavulanate in a 2:1 ratio (CLSI) or a fixed concentration of clavulanate (2 mg/L)  
510 (EUCAST), with *E. coli* controls ATCC25922 (wild type) and ATCC35218 (TEM-1 beta-  
511 lactamase producer).(47) For additional quality control, bacterial isolates were plated on sheep  
512 blood agar and incubated overnight at 37°C to check purity, with isolates excluded if multiple



513 colonial morphologies were seen. Isolates were included in analyses if two or more MICs for  
514 each of amoxicillin, EUCAST-based amoxicillin-clavulanate and CLSI-based amoxicillin-  
515 clavulanate were in essential agreement (i.e. a minimum of 2/3 for each drug; see Supplementary  
516 Methods). Isolates with less than two MICs for each of the tests passing quality control were  
517 tested an additional time to reduce the risk of selection bias against isolates with genetic  
518 mechanisms causing variable expression and underestimating natural phenotypic variability. For  
519 each included isolate, susceptibility classification for that isolate was defined using the “upper  
520 median” MIC (choosing the higher MIC when the median lay between two MIC readings) of the  
521 test repeats.

522

### 523 *Modelling and predicting MICs*

524 Random-effects models (Stata 14.2; StataCorp LP, 2015) were used to investigate the impact of  
525 test method and WGS-identified genetic elements on agar dilution  $\log_2$  MICs simultaneously  
526 (additional details in Supplementary Methods). Elements were categorised depending on  
527 frequency (Supplementary Table S4). Models included method-specific random-effects for each  
528 isolate and testing batch, and method-specific (heteroskedastic) errors. All genetic element  
529 categories were included *a priori*, but the most predictive effects of each (including  
530 presence/absence of genes and/or promoter mutations and/or gene dosage) were selected using  
531 the Akaike Information Criterion (AIC) (Supplementary Methods). Lastly, interaction terms  
532 between genetic elements (reflecting saturation effects) and with test methodology (reflecting  
533 differential impact of the same genetic mechanism depending on the amoxicillin:clavulanate  
534 ratio) were included where  $p < 0.05$ . Final estimates were then used to predict MICs in all non-  
535 subsample isolates and in non-subsample isolates which did not contain resistance features not

536 present in the agar dilution subsample. Predicted MICs were then compared to routine laboratory  
537 phenotypes from the BD Phoenix.

538 **Acknowledgments:**

539 This work uses data provided by patients and collected by the NHS as part of their care and  
540 support. We thank all the people of Oxfordshire who contribute to the Infections in Oxfordshire  
541 Research Database. Research Database Team: R Alstead, C Bunch, DCW Crook, J Davies, J  
542 Finney, J Gearing (community), L O'Connor, TEA Peto (PI), TP Quan, J Robinson  
543 (community), B Shine, AS Walker, D Waller, D Wyllie. Patient and Public Panel: G Blower, C  
544 Mancey, P McLoughlin, B Nichols. We would also like to thank the HPRU Steering Group (N  
545 French, C Marwick, J Coia, M Sharland).

546 **Funding:**

547 The study was funded by the National Institute for Health Research Health Protection Research  
548 Unit (NIHR HPRU) in Healthcare Associated Infections and Antimicrobial Resistance at Oxford  
549 University in partnership with Public Health England (PHE) [grant HPRU-2012-10041]. DWC,  
550 TEAP and ASW are supported by the NIHR Oxford Biomedical Research Centre. The report  
551 presents independent research funded by the National Institute for Health Research. The views  
552 expressed in this publication are those of the authors and not necessarily those of the NHS, the  
553 National Institute for Health Research, the Department of Health or Public Health England. NS is  
554 funded by a PHE/University of Oxford Clinical Lectureship. DWC, TEAP and ASW are NIHR  
555 Senior Investigators.

556 **Author contributions:**

557 TJD, NS, MJE, NW, DWC, TEAP, MFA and ASW designed the study. KJ, MA(OUH), MM,  
558 TPQ obtained the automated susceptibility phenotypes from archived BD phoenix records. TJD,  
559 and MA(APHA) performed agar dilution on samples. DG and AV sequenced isolates. TJD, HP  
560 and JS ran resistance genotype prediction on samples. TJD, AS, NS, OE, RB and AM interpreted  
561 the genetic results and established rules regarding the relationship with phenotype. TJD and  
562 ASW fitted random-effects models to the data. TJD, NS, AS, PF, ASW and MFA prepared the  
563 first draft. All authors commented on the data and its interpretation, revised the content critically  
564 and approved the final version.

565 **Competing interests:**

566 None to declare. However, for NW and MJE, PHE's AMRHAI Reference Unit has received  
567 financial support for conference attendance, lectures, research projects or contracted evaluations  
568 from numerous sources, including: Accelerate Diagnostics, Achaogen Inc, Allecra Therapeutics,  
569 Amplex, AstraZeneca UK Ltd, AusDiagnostics, Basilea Pharmaceutica, Becton Dickinson  
570 Diagnostics, bioMérieux, Bio-Rad Laboratories, The BSAC, Cepheid, Check-Points B.V., Cubist  
571 Pharmaceuticals, Department of Health, Enigma Diagnostics, European Centre for Disease  
572 Prevention and Control, Food Standards Agency, GlaxoSmithKline Services Ltd, Helperby  
573 Therapeutics, Henry Stewart Talks, IHMA Ltd, Innovate UK, Kalidex Pharmaceuticals, Melinta  
574 Therapeutics, Merck Sharpe & Dohme Corp, Meiji Seika Pharma Co., Ltd, Mobidiag,  
575 Momentum Biosciences Ltd, Neem Biotech, NIHR, Nordic Pharma Ltd, Norgine  
576 Pharmaceuticals, Rempex Pharmaceuticals Ltd, Roche, Rokitan Ltd, Smith & Nephew UK Ltd,  
577 Shionogi & Co. Ltd, Trius Therapeutics, VenatoRx Pharmaceuticals, Wockhardt Ltd., and the  
578 World Health Organization.

579 **Data and materials availability:**

580 Sequences used in the study are made available at PRJNA540750. MIC data and code used for  
581 this analysis are available at  
582 [https://github.com/TimothyJDavies/reconciling\\_the\\_potentially\\_irreconcilable](https://github.com/TimothyJDavies/reconciling_the_potentially_irreconcilable)

583

584

585   References:

- 586   1.    Public Health England. 2018. English Surveillance Programme for Antimicrobial  
587       Utilisation and Resistance (ESPAUR).
- 588   2.    Plachouras D, Kärki T, Hansen S, Hopkins S, Lyytikäinen O, Moro ML, Reilly J, Zarb P,  
589       Zingg W, Kinross P, Weist K, Monnet DL, Suetens C, Group the PPSS. 2018.  
590       Antimicrobial use in European acute care hospitals: results from the second point  
591       prevalence survey (PPS) of healthcare-associated infections and antimicrobial use, 2016 to  
592       2017. *Eurosurveillance* 23:1800393.
- 593   3.    Diez-Aguilar M, Morosini M-I, Lopez-Cerero L, Pascual A, Calvo J, Martinez-Martinez  
594       L, Marco F, Vila J, Ortega A, Oteo J, Canton R. 2015. Performance of EUCAST and  
595       CLSI approaches for co-amoxiclav susceptibility testing conditions for clinical  
596       categorization of a collection of *Escherichia coli* isolates with characterized resistance  
597       phenotypes. *J Antimicrob Chemother* 70:2306–2310.
- 598   4.    Mouton J. 2017. Antimicrobial susceptibility testing with EUCAST breakpoints and  
599       methods, p. . *In* Mouton, J (ed.), ECCMID. Vienna, Austria.
- 600   5.    Vihta K-D, Stoesser N, Llewelyn MJ, Quan TP, Davies T, Fawcett NJ, Dunn L, Jeffery K,  
601       Butler CC, Hayward G, Andersson M, Morgan M, Oakley S, Mason A, Hopkins S, Wyllie  
602       DH, Crook DW, Wilcox MH, Johnson AP, Peto TEA, Walker AS. 2018. Trends over time  
603       in *Escherichia coli* bloodstream infections, urinary tract infections, and antibiotic  
604       susceptibilities in Oxfordshire, UK, 1998-2016: a study of electronic health records.  
605       *Lancet Infect Dis* 18:1138–1149.
- 606   6.    Kallonen T, Brodrick HJ, Harris SR, Corander J, Brown NM, Martin V, Peacock SJ,

- 607 Parkhill J. 2017. Systematic longitudinal survey of invasive *Escherichia coli* in England  
608 demonstrates a stable population structure only transiently disturbed by the emergence of  
609 ST131. *Genome Res.*
- 610 7. Drawz SM, Bonomo RA. 2010. Three decades of beta-lactamase inhibitors. *Clin*  
611 *Microbiol Rev* 23:160–201.
- 612 8. Bush K. 2015. A resurgence of beta-lactamase inhibitor combinations effective against  
613 multidrug-resistant Gram-negative pathogens. *Int J Antimicrob Agents* 46:483–493.
- 614 9. European Committee on Antimicrobial Susceptibility Testing. 2017. Guidance document  
615 on beta-lactamase inhibitor combinations.
- 616 10. Humphries R. 2018. Mechanisms of resistance to ceftazidime- avibactam ECCMID.  
617 Madrid, Spain.
- 618 11. Ellington MJ, Ekelund O, Aarestrup FM, Canton R, Doumith M, Giske C, Grundman H,  
619 Hasman H, Holden MTG, Hopkins KL, Iredell J, Kahlmeter G, Koser CU, MacGowan A,  
620 Mevius D, Mulvey M, Naas T, Peto T, Rolain J-M, Samuelsen O, Woodford N. 2017. The  
621 role of whole genome sequencing in antimicrobial susceptibility testing of bacteria: report  
622 from the EUCAST Subcommittee. *Clin Microbiol Infect* 23:2–22.
- 623 12. Harris PNA, Tambyah PA, Lye DC, Mo Y, Lee TH, Yilmaz M, Alenazi TH, Arabi Y,  
624 Falcone M, Bassetti M, Righi E, Rogers BA, Kanj S, Bhally H, Iredell J, Mendelson M,  
625 Boyles TH, Looke D, Miyakis S, Walls G, Al Khamis M, Zikri A, Crowe A, Ingram P,  
626 Daneman N, Griffin P, Athan E, Lorenc P, Baker P, Roberts L, Beatson SA, Peleg AY,  
627 Harris-Brown T, Paterson DL, MERINO Trial Investigators and the Australasian Society  
628 for Infectious Disease Clinical Research Network (ASID-CRN). 2018. Effect of

- 629 Piperacillin-Tazobactam vs Meropenem on 30-Day Mortality for Patients With *E coli* or  
630 *Klebsiella pneumoniae* Bloodstream Infection and Ceftriaxone Resistance. JAMA  
631 320:984.
- 632 13. Livermore DM, Day M, Cleary P, Hopkins KL, Toleman MA, Wareham DW, Wiuff C,  
633 Doumith M, Woodford N. 2018. OXA-1  $\beta$ -lactamase and non-susceptibility to  
634 penicillin/ $\beta$ -lactamase inhibitor combinations among ESBL-producing *Escherichia coli*. J  
635 Antimicrob Chemother dky453-dky453.
- 636 14. Ortega A, Oteo J, Aranzamendi-Zaldumbide M, Bartolome RM, Bou G, Cercenado E,  
637 Conejo MC, Gonzalez-Lopez JJ, Marin M, Martinez-Martinez L, Merino M, Navarro F,  
638 Oliver A, Pascual A, Rivera A, Rodriguez-Bano J, Weber I, Aracil B, Campos J. 2012.  
639 Spanish multicenter study of the epidemiology and mechanisms of amoxicillin-  
640 clavulanate resistance in *Escherichia coli*. Antimicrob Agents Chemother 56:3576–3581.
- 641 15. Livermore DM. 1997. beta-Lactamases: quantity and resistance. Clin Microbiol Infect 3  
642 Suppl 4:S10–S19.
- 643 16. Stoesser N, Batty EM, Eyre DW, Morgan M, Wyllie DH, Del Ojo Elias C, Johnson JR,  
644 Walker AS, Peto TEA, Crook DW. 2013. Predicting antimicrobial susceptibilities for  
645 *Escherichia coli* and *Klebsiella pneumoniae* isolates using whole genomic sequence data. J  
646 Antimicrob Chemother 68:2234–2244.
- 647 17. Zankari E, Hasman H, Kaas RS, Seyfarth AM, Agerso Y, Lund O, Larsen MV, Aarestrup  
648 FM. 2013. Genotyping using whole-genome sequencing is a realistic alternative to  
649 surveillance based on phenotypic antimicrobial susceptibility testing. J Antimicrob  
650 Chemother 68:771–777.

- 651 18. Feldgarden M, Brover V, Haft DH, Prasad AB, Slotta DJ, Tolstoy I, Tyson GH, Zhao S,  
652 Hsu C-H, McDermott PF, Tadesse DA, Morales C, Simmons M, Tillman G, Wasilenko J,  
653 Folster JP, Klimke W. 2019. Validating the NCBI AMRFinder Tool and Resistance Gene  
654 Database Using Antimicrobial Resistance Genotype-Phenotype Correlations in a  
655 Collection of NARMS Isolates. *Antimicrob Agents Chemother* AAC.00483-19.
- 656 19. Tyson GH, McDermott PF, Li C, Chen Y, Tadesse DA, Mukherjee S, Bodeis-Jones S,  
657 Kabera C, Gaines SA, Loneragan GH, Edrington TS, Torrence M, Harhay DM, Zhao S.  
658 2015. WGS accurately predicts antimicrobial resistance in *Escherichia coli*. *J Antimicrob*  
659 *Chemother* 70:2763–2769.
- 660 20. Shelburne SA, Kim J, Munita JM, Sahasrabhojane P, Shields RK, Press EG, Li X, Arias  
661 CA, Cantarel B, Jiang Y, Kim MS, Aitken SL, Greenberg DE. 2017. Whole-Genome  
662 Sequencing Accurately Identifies Resistance to Extended-Spectrum beta-Lactams for  
663 Major Gram-Negative Bacterial Pathogens. *Clin Infect Dis* 65:738–745.
- 664 21. Hunt M, Mather AE, Sánchez-Busó L, Page AJ, Parkhill J, Keane JA, Harris SR. 2017.  
665 ARIBA: rapid antimicrobial resistance genotyping directly from sequencing reads. *Microb*  
666 *genomics* 3:e000131.
- 667 22. Ambler RP, Coulson AF, Frère JM, Ghuysen JM, Joris B, Forsman M, Levesque RC,  
668 Tiraby G, Waley SG. 1991. A standard numbering scheme for the class A beta-  
669 lactamases. *Biochem J* 276 ( Pt 1:269–70).
- 670 23. Shen Z, Ding B, Bi Y, Wu S, Xu S, Xu X, Guo Q, Wang M. 2017. CTX-M-190, a Novel  
671 beta-Lactamase Resistant to Tazobactam and Sulbactam, Identified in an *Escherichia coli*  
672 Clinical Isolate. *Antimicrob Agents Chemother* 61.



- 673 24. Brumfitt W, Hamilton Miller JMT, Dixson S, Gargan RA, Gooding A. 1983. Phenomenon  
674 of resistance to Augmentin associated with sensitivity to ampicillin: Occurrence and  
675 explanation. *J Clin Pathol* 36:670–673.
- 676 25. Brumfitt W, Hamilton-Miller JM. 1983. Differential sensitivities to  
677 amoxicillin/clavulanate and amoxicillin in general practice urinary infections. *Lancet*  
678 (London, England). England.
- 679 26. Su M, Satola SW, Read TD. 2019. Genome-based prediction of bacterial antibiotic  
680 resistance. *J Clin Microbiol.*
- 681 27. 2018. EUCAST Frequently Asked Questions EUCAST Frequently Asked Questions 1.  
682 EUCAST Disk Diffusion Test-Medium.
- 683 28. Haidar G, Clancy CJ, Chen L, Samanta P, Shields RK, Kreiswirth BN, Nguyen MH. 2017.  
684 Identifying Spectra of Activity and Therapeutic Niches for Ceftazidime-Avibactam and  
685 Imipenem-Relebactam against Carbapenem-Resistant Enterobacteriaceae. *Antimicrob*  
686 *Agents Chemother* 61:e00642-17.
- 687 29. Feldgarden M, Brover V, Haft DH, Prasad AB, Slotta DJ, Tolstoy I, Tyson GH, Zhao S,  
688 Hsu C-H, McDermott PF, Tadesse DA, Morales C, Simmons M, Tillman G, Wasilenko J,  
689 Folster JP, Klimke W. 2019. Using the NCBI AMRFinder Tool to Determine  
690 Antimicrobial Resistance Genotype-Phenotype Correlations Within a Collection of  
691 NARMS Isolates. *bioRxiv* 550707.
- 692 30. Díez-Aguilar M, Morosini M-I, López-Cerero L, Pascual Á, Calvo J, Martínez-Martínez  
693 L, Marco F, Vila J, Ortega A, Oteo J, Cantón R. 2015. Performance of EUCAST and  
694 CLSI approaches for co-amoxiclav susceptibility testing conditions for clinical

- 695 categorization of a collection of *Escherichia coli* isolates with characterized resistance  
696 phenotypes. *J Antimicrob Chemother* 70:2306–2310.
- 697 31. Ortega A, Oteo JJ, Aranzamendi-Zaldumbide M, Bartolome RM, Bou GG, Cercenado E,  
698 Conejo MC, Gonzalez-Lopez JJ, Marin M, Martinez-Martinez L, Merino MM, Navarro F,  
699 Oliver A, Pascual A, Rivera A, Rodriguez-Bano J, Weber I, Aracil BB, Campos JJ,  
700 Bartolomé RM, Bou GG, Cercenado E, Conejo MC, José González-López J, Marín M,  
701 Martínez-Martínez L, Merino MM, Navarro F, Oliver A, Pascual Á, Rivera A, Rodríguez-  
702 Baño J, Weber I, Aracil BB, Campos JJ. 2012. Spanish multicenter study of the  
703 epidemiology and mechanisms of amoxicillin-clavulanate resistance in *Escherichia coli*.  
704 *Antimicrob Agents Chemother* 56:3576–3581.
- 705 32. Spafford K, MacVane S, Humphries R. 2019. Evaluation of empiric beta-lactam  
706 susceptibility prediction among Enterobacteriaceae by molecular beta-lactamase gene  
707 testing. *J Clin Microbiol* JCM.00674-19.
- 708 33. Kim J, Greenberg DE, Pfifer R, Jiang S, Xiao G, Xie Y, Shelburne SA, Koh A, Zhan X.  
709 2019. VAMPr: VARIant Mapping and Prediction of antibiotic resistance via explainable  
710 features and machine learning. bioRxiv 537381.
- 711 34. 2000. Determination of minimum inhibitory concentrations (MICs) of antibacterial agents  
712 by agar dilution. *Clin Microbiol Infect* 6:509–515.
- 713 35. CLSI. 2019. CLSI supplement M100, Performance Standards for Antimicrobial  
714 Susceptibility Testing, 29th ed. Wayne, PA.
- 715 36. María D-A, María-Isabel M, María-Carmen C, Álvaro P, Jorge C, Luis M-M, Francesc M,  
716 Jordi V, Adriana O, Jesús O, Rafael C. 2016. Establishing the validity of different

- 717 susceptibility testing methods to evaluate the in vitro activity of amoxicillin-clavulanate  
718 against *Escherichia coli*. *Diagn Microbiol Infect Dis* 84:334–336.
- 719 37. Finney JM, Walker AS, Peto TEA, Wyllie DH. 2011. An efficient record linkage scheme  
720 using graphical analysis for identifier error detection. *BMC Med Inform Decis Mak* 11:7.
- 721 38. Zerbino DR, Birney E. 2008. Velvet: algorithms for de novo short read assembly using de  
722 Bruijn graphs. *Genome Res* 18:821–829.
- 723 39. Stoesser N, Sheppard AE, Peirano G, Anson LW, Pankhurst L, Sebra R, Phan HTT,  
724 Kasarskis A, Mathers AJ, Peto TEA, Bradford P, Motyl MR, Walker AS, Crook DW,  
725 Pitout JD. 2017. Genomic epidemiology of global *Klebsiella pneumoniae* carbapenemase  
726 (KPC)-producing *Escherichia coli*. *Sci Rep* 7:5917.
- 727 40. Wirth T, Falush D, Lan R, Colles F, Mensa P, Wieler LH, Karch H, Reeves PR, Maiden  
728 MCJ, Ochman H, Achtman M. 2006. Sex and virulence in *Escherichia coli*: an  
729 evolutionary perspective. *Mol Microbiol* 60:1136–1151.
- 730 41. Altschul SF, Gish W, Miller W, Myers EW, Lipman DJ. 1990. Basic local alignment  
731 search tool. *J Mol Biol* 215:403–410.
- 732 42. Wu P-J, Shannon K, Phillips I. 1995. Mechanisms of hyperproduction of TEM-1  $\beta$ -  
733 lactamase by clinical isolates of *Escherichia coli*. *J Antimicrob Chemother* 36:927–939.
- 734 43. Shropshire WC, Aitken SL, Pifer R, Kim J, Bhatti MM, Li X, Kalia A, Galloway-Peña J,  
735 Sahasrabhojane P, Arias CA, Greenberg DE, Hanson BM, Shelburne SA. Title:  $\beta$ -  
736 lactamase Amplification and Porin Loss Drive Progressive  $\beta$ -lactam Resistance in  
737 Recurrent ESBL Enterobacteriaceae Bacteremia One Sentence Summary: Amplification  
738 of  $\beta$ -lactam genes with porin loss was associated with development of  $\beta$ -lactam resista.

- 739 44. Lartigue MF, Leflon-Guibout V, Poirel L, Nordmann P, Nicolas-Chanoine M-H. 2002.  
740 Promoters P3, Pa/Pb, P4, and P5 upstream from bla(TEM) genes and their relationship to  
741 beta-lactam resistance. *Antimicrob Agents Chemother* 46:4035–4037.
- 742 45. Peter-Getzlaff S, Polsfuss S, Poledica M, Hombach M, Giger J, Bottger EC, Zbinden R,  
743 Bloemberg G V. 2011. Detection of AmpC beta-lactamase in *Escherichia coli*:  
744 comparison of three phenotypic confirmation assays and genetic analysis. *J Clin Microbiol*  
745 49:2924–2932.
- 746 46. Caroff N, Espaze E, Bérard I, Richet H, Reynaud A. 1999. Mutations in the ampC  
747 promoter of *Escherichia coli* isolates resistant to oxyiminocephalosporins without  
748 extended spectrum  $\beta$ -lactamase production. *FEMS Microbiol Lett* 173:459–465.
- 749 47. Andrews JM. 2001. Determination of minimum inhibitory concentrations. *J Antimicrob*  
750 *Chemother* 48:5–16.
- 751
- 752

Figure 1: Association between transmissible beta-lactamase gene DNA copy number and amoxicillin-clavulanate MIC in isolates with no alternative resistance features.

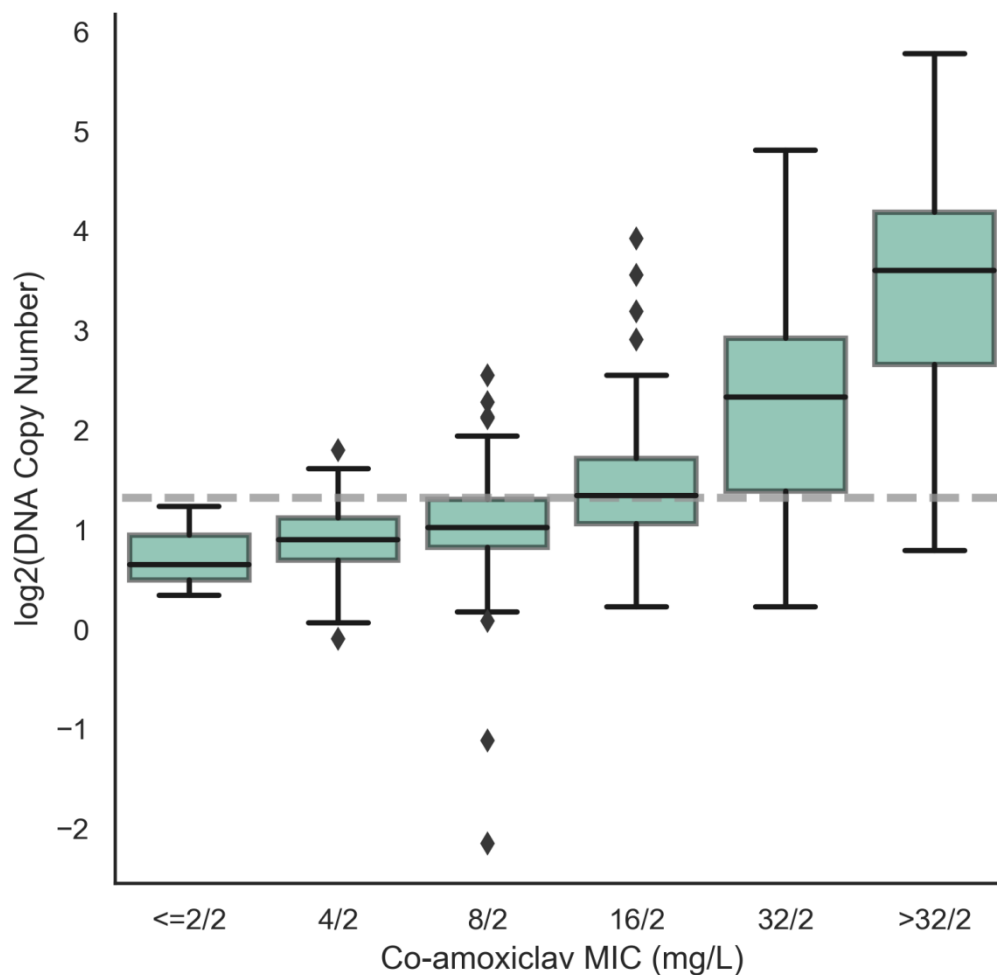

Note: Evidence for association between MIC and log<sub>2</sub>(DNA copy number)  $p < 0.0001$ , estimated using quantile regression. Grey line indicates 2.5 threshold used to define resistance in the extended algorithm based on ROC analysis (Supplementary Figure S3A). Of these 328 isolates, 294 had *bla*<sub>TEM</sub> genes (290 with *bla*<sub>TEM-1</sub>, 4 with other non-inhibitor resistant *bla*<sub>TEM</sub> genes), 19 had non-inhibitor resistant *bla*<sub>SHV</sub> genes and 15 had *bla*<sub>CTX-M</sub> genes.

Figure 2: Proportion WGS predicted resistant (extended algorithm) by routine laboratory MIC

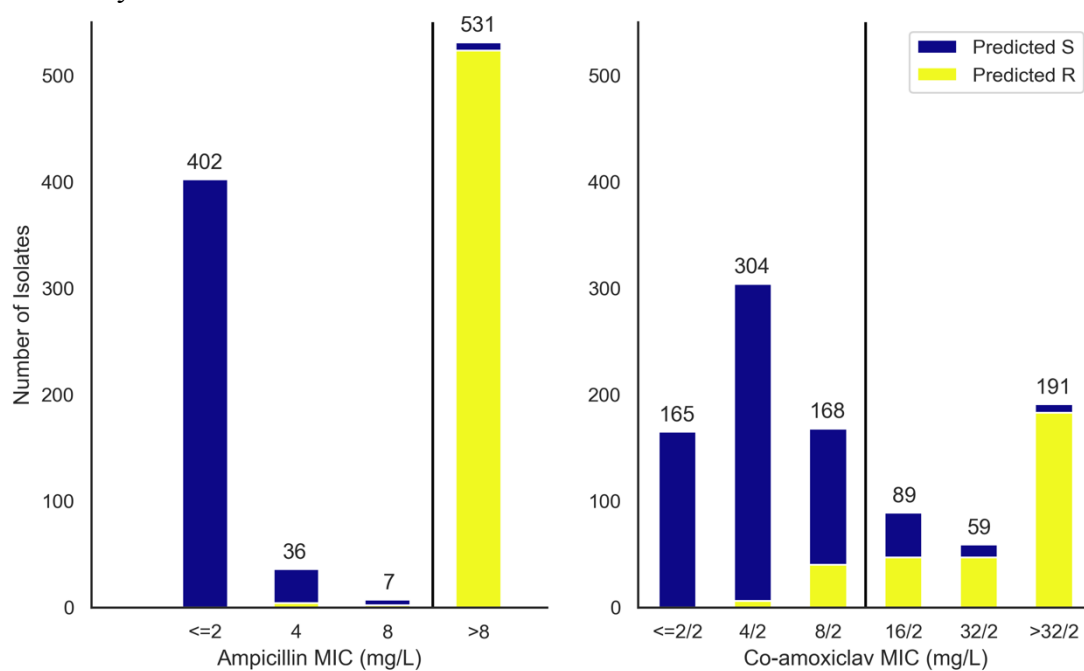

Figure 3: Comparison of the three different phenotyping methods on the agar-dilution subsample isolates (N=261)

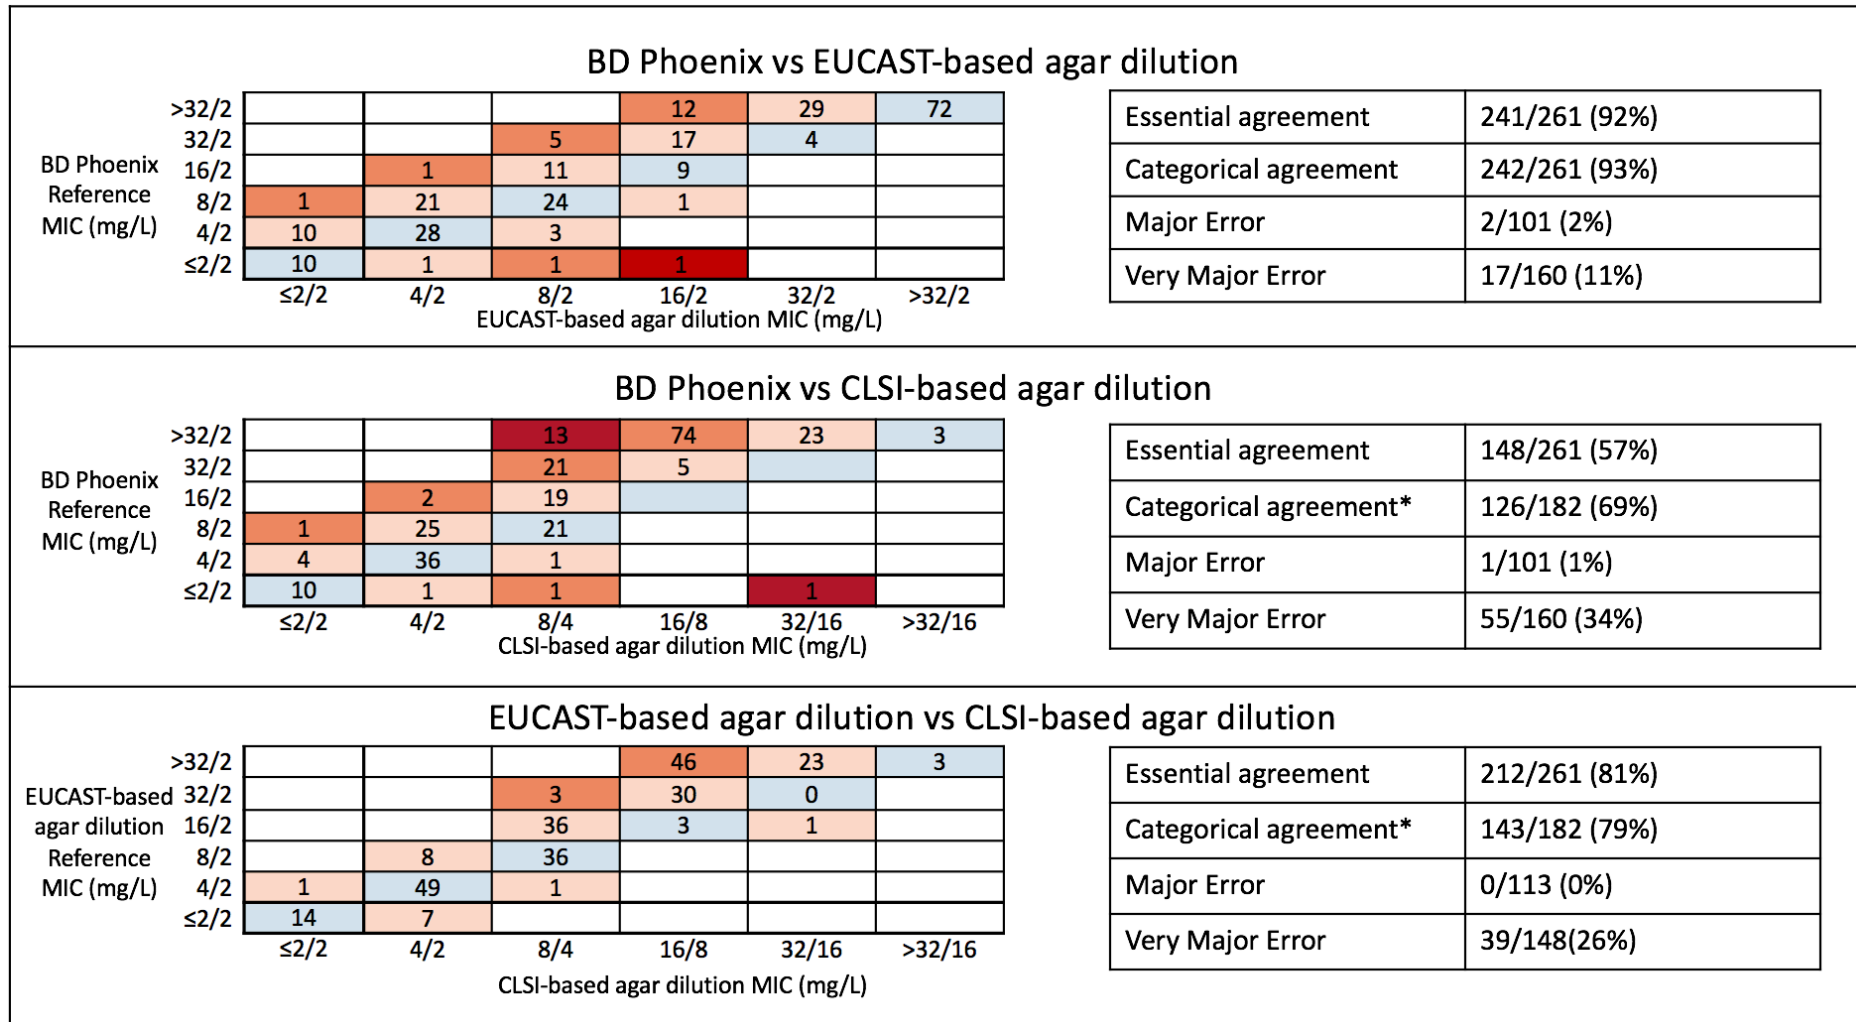

Note: Comparison of MICs obtained using the three different phenotyping methods; EUCAST-based agar-dilution, CLSI-based agar dilution and BD Phoenix (performed in the OUH microbiology laboratory and using panels calibrated against EUCAST guidelines). \*: Isolates are in categorical agreement if they are reported as either resistant by both methods (i.e. BD Phoenix/EUCAST-based agar dilution MIC  $>8/2$  mg/L and CLSI-based agar dilution  $> 16/8$  mg/L) or susceptible by both methods (i.e. BD Phoenix/EUCAST-based agar dilution MIC  $\leq 8/2$  mg/L and CLSI-based agar dilution MIC  $\leq 8/4$  mg/L). Intermediate isolates were excluded from these comparisons (but are shown above) as BD phoenix/EUCAST-based agar dilution have no intermediate category. Blue: full agreement of MICs, light orange: essential agreement, dark orange: within two doubling dilutions (theoretically feasible believing both tests having an error of  $\pm 1$  dilution) and red: disagreement.



Figure 4 Proportion WGS predicted resistant (extended algorithm) by MICs from EUCAST and CLSI-based methods

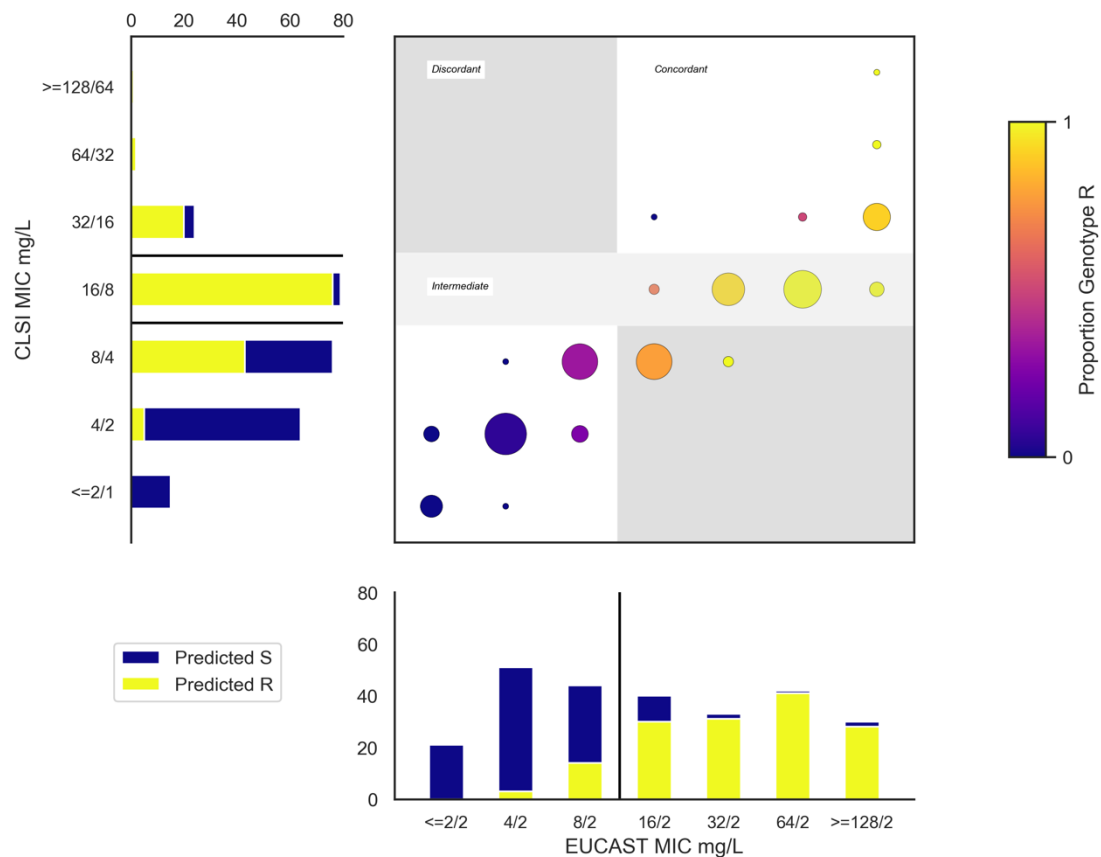

Note: Main panel, each (x,y) coordinate represents (EUCAST-based MIC,CLSI-based MIC) combination. At each coordinate, circle size represents the number of isolates with this combination of fixed and ratio MICs, and color denotes proportion identified as resistant by WGS as indicated by the color bar to the right of the figure. The two sub-panels (bar charts to the left and bottom of the main panel) show the number of isolates with each MIC (in line with the main panel). Yellow/blue coloring indicate which of these were predicted resistant/susceptible respectively, and black lines indicate cut-offs used to determine resistance classification (susceptible/resistant for EUCAST-based agar dilution, susceptible/intermediate/resistant for CLSI-based agar dilution).

Figure 5: Changes in doubling dilution MIC independently associated with each feature/testing method (multivariable random-effects model).

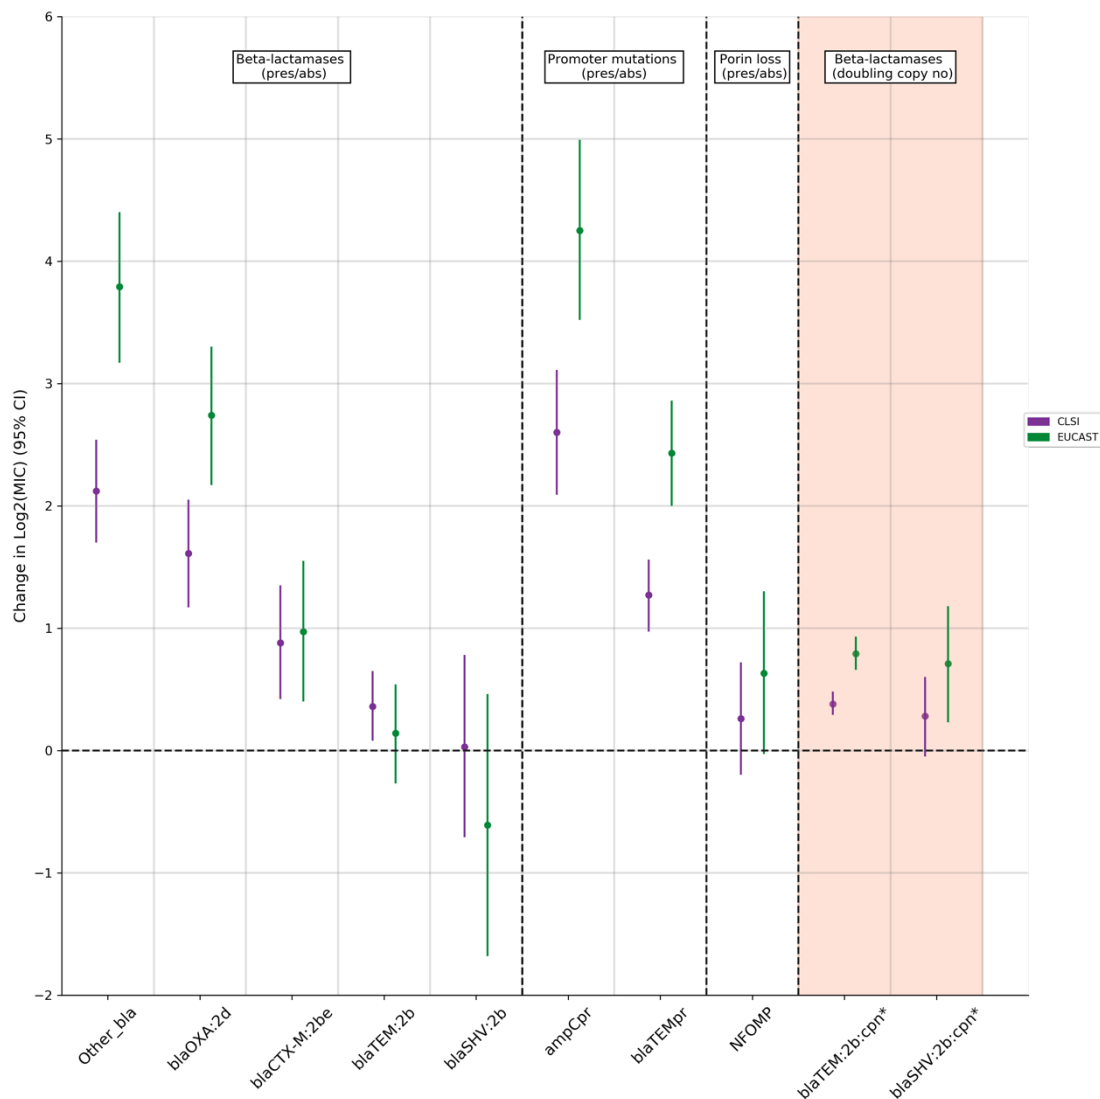

Note: Purple represents testing using 2:1 CLSI-based agar dilution (CLSI), and green using EUCAST-based agar dilution. All elements except those denoted by \* and shaded in orange are modelled as binary presence vs absence effects (see Supplementary Methods.), Other\_bla (grouped other bla genes, includes bla<sub>TEM-40</sub> (N=2), bla<sub>TEM-30</sub> (N=3), bla<sub>CMY-2</sub> (N=3), bla<sub>OXA-48</sub> (N=1), bla<sub>TEM-190</sub> (N=1), bla<sub>TEM-33</sub> (N=1), Supplementary Table 2) bla<sub>OXA:2d</sub> (Bush-Jacoby 2d, bla<sub>OXA</sub>), bla<sub>CTXM:2be</sub> (Bush-Jacoby 2be, CTXM), bla<sub>TEM:2b</sub> (Bush-Jacoby 2b, bla<sub>TEM</sub>), bla<sub>SHV:2b</sub> (Bush-Jacoby 2b, SHV), ampCpr (ampC promoter mutation suggesting increased

expression), blaTEMpr( bla<sub>TEM</sub> hyper-producing promoter), NFOMP(non-functional ompF/ompC), blaTEM:2b:cpn (copy number) effect modelled as effect of doubling copy number, blaSHV:2b:cpn (copy number) effect modelled as effect of doubling copy number

Figure 6 Model based MIC prediction for non-subsample isolates (N=704)

|            |       |                      |     |      |      |       |
|------------|-------|----------------------|-----|------|------|-------|
|            | >32/2 |                      | 2   | 6    | 17   | 49    |
| BD Phoenix | 32/2  | 1                    | 3   | 8    | 14   | 7     |
| Reference  | 16/2  | 3                    | 19  | 36   | 6    | 3     |
| MIC (mg/L) | 8/2   | 10                   | 64  | 41   | 1    |       |
|            | ≤4/2  | 391                  | 21  | 2    |      |       |
|            |       | ≤4/2                 | 8/2 | 16/2 | 32/2 | >32/2 |
|            |       | Predicted MIC (mg/L) |     |      |      |       |

|                       |               |
|-----------------------|---------------|
| Essential agreement   | 683/704 (97%) |
| Categorical agreement | 632/704 (90%) |
| Major Error           | 44/530 (8%)   |
| Very Major Error      | 28/174(16%)   |

Note: blue shading indicates correct correctly predicted observed AST MIC (554/704 (79%) isolates), light pink predicted within one doubling dilution (total 683/704 (97%) isolates, essential agreement), orange within two doubling dilutions (total 701/704 (100%)) and red greater than 2 doubling dilutions. Excluding 11 isolates with resistance mechanisms not included in the agar-dilution subsample on which the prediction model was derived (similar overall performance including these).

Table 1: Performance of WGS-based prediction using both basic and extended algorithms

| <b>WGS-predicted phenotype<br/>(No. isolates)</b> | <b>AST Phenotype<br/>(No. isolates)</b> |     | <b>Sensitivity<br/>(%)</b> | <b>Specificity<br/>(%)</b> |
|---------------------------------------------------|-----------------------------------------|-----|----------------------------|----------------------------|
| <b>Ampicillin: basic</b>                          | S                                       | R   | 96                         | 99                         |
| S                                                 | 441                                     | 20  |                            |                            |
| R                                                 | 4                                       | 511 |                            |                            |
| <b>Ampicillin: extended prediction</b>            | S                                       | R   | 98                         | 99                         |
| S                                                 | 439                                     | 8   |                            |                            |
| R                                                 | 6                                       | 523 |                            |                            |
| <b>Amoxicillin-clavulanate: basic</b>             | S                                       | R   | 23                         | 100                        |
| S                                                 | 634                                     | 261 |                            |                            |
| R                                                 | 3                                       | 78  |                            |                            |
| <b>Amoxicillin-clavulanate: extended</b>          | S                                       | R   | 82                         | 93                         |
| S                                                 | 591                                     | 62  |                            |                            |
| R                                                 | 46                                      | 277 |                            |                            |

Table 2: Resistance prediction feature performance

| Feature                                                                                                                                                 | Prediction | Number of isolates resistant by routine AST/total isolates with this feature (%) |                                    |
|---------------------------------------------------------------------------------------------------------------------------------------------------------|------------|----------------------------------------------------------------------------------|------------------------------------|
|                                                                                                                                                         |            | PPV                                                                              | PPV when in isolation <sup>+</sup> |
| <b>Beta-lactamases</b>                                                                                                                                  |            |                                                                                  |                                    |
| 1 Any class C or D serine beta-lactamase                                                                                                                | Basic      | 66/69 (96%)                                                                      | 32/34 (94%)                        |
| 2 Any inhibitor resistant class A beta-lactamase                                                                                                        | Basic      | 12/12 (100%)                                                                     | 2/2 (100%)                         |
| <b>Promoter mutations</b>                                                                                                                               |            |                                                                                  |                                    |
| 3 Non-P3 <i>bla</i> <sub>TEM</sub> promoter associated with <i>bla</i> <sub>TEM</sub> hyper-production                                                  | Extended   | 48/49 (98%)                                                                      | 29/30 (97%)                        |
| 4 - <i>ampC</i> promoter mutation associated with <i>ampC</i> hyper-production                                                                          | Extended   | 20/20 (100%)                                                                     | 13/13 (100%)                       |
| <b>Increased DNA copy number</b>                                                                                                                        |            |                                                                                  |                                    |
| 5 Relative coverage of any transmissible beta-lactamase > 2.5*                                                                                          | Extended   | 184/227 (81%)                                                                    | 128/167 (77%)                      |
| <b>Decreased permeability<sup>o</sup></b>                                                                                                               |            |                                                                                  |                                    |
| 6 Features suggesting disruption of either <i>ompC</i> or <i>ompF</i> in an isolate containing an additional beta-lactamase (see supplementary methods) | Extended   | 19/22 (86%)                                                                      | 2/2 (100%)                         |

+ : PPV restricted to isolates not predicted as amoxicillin-clavulanate resistant by any other feature

\*: Cut-off chosen following a receiver operating curve (ROC) analysis (Supplementary Methods, Supplementary Figure 3A)

<sup>o</sup>: Beta-lactam resistance features in isolates shown in Supplementary Tables S2, S3, S4

Note: PPV=positive predictive value

## **Supplementary material for: Reconciling the potentially irreconcilable? Genotypic and phenotypic amoxicillin-clavulanate resistance in *Escherichia coli***

### **List of contents**

Supplementary Materials and Methods

Supplementary Figure S1: Sampling frame and sample selection

A: Sampling frame and included isolates

B: Agar dilution subsample selection

Supplement Figure S2: Isolate STs, resistance mechanisms and amoxicillin-clavulanate phenotyping for:

A: The full dataset (N=976)

B: The agar dilution subsample (N=261)

Supplementary Figure S3: Estimating the coverage copy number cut-off

A: ROC curve for selection of DNA copy number threshold for the extended resistance prediction

B: Association between DNA copy number and agar-dilution phenotype in isolates containing only non-inhibitor resistant beta-lactamases

C: Persistent classification errors even when choosing optimal coverage cut-offs due to normal distribution of MICs, demonstrated in isolates containing only low copy number  $bla_{TEM-1}$

Supplementary Figure S4: Maximum MIC doubling dilution difference across repeats by method for subsample isolates

Supplementary Table S1: Beta-lactam antibiograms

Supplementary Table S2: Beta-lactamases

Supplementary Table S3: Promoter sequences

A: *ampC* promoters

B: amoxicillin-clavulanate MICs of *ampC* hyper-producing isolates

C:  $bla_{TEM}$  promoters

Supplementary Table S4: Disrupted porin genes

Supplementary Table S5: Random-effects model categories

Supplementary Table S6: Unadjusted resistance feature effects

Supplementary Table S7: Random-effects model results

A: Independent predictors of agar dilution log<sub>2</sub> MIC

B: Estimated variation in MIC according to different sources from the random-effects model
